## **The 2',3' cyclic phosphatase Angel1 facilitates mRNA degradation during human ribosome-associated quality control**

Tim Nicholson-Shaw<sup>1</sup>, Yasmeen Ajaj<sup>1</sup>, Mark Perelis<sup>2,3,4</sup>, Amit Fulzele<sup>1</sup>, Gene W. Yeo<sup>2,3,4</sup>, Eric J. Bennett<sup>1</sup> and Jens Lykke-Andersen<sup>1,5,\*</sup>

<sup>1</sup>Division of Biological Sciences, University of California San Diego, 9500 Gilman Drive, La Jolla, CA 92093, USA

<sup>2</sup>Department of Cellular and Molecular Medicine, University of California San Diego, 9500 Gilman Drive, La Jolla, CA 92093, USA

<sup>3</sup>Stem Cell Program, University of California San Diego, Sanford Consortium for Regenerative Medicine, 2880 Torrey Pines Scenic Drive, La Jolla, CA 92037, USA

<sup>4</sup>Institute for Genomic Medicine, University of California San Diego, 9500 Gilman Drive, La Jolla, CA 92093, USA

<sup>5</sup>Lead contact

\*Correspondence: [jlykkeandersen@ucsd.edu](mailto:jlykkeandersen@ucsd.edu)

## **Summary**

The Ribosome-associated Quality Control (RQC) pathway serves to resolve ribosomes stalled during the translation process and degrade the associated mRNA and nascent polypeptide.

Here we identify the 2',3' cyclic phosphatase Angel1 as a rate-limiting factor for this process in human cells. Angel1 associates with proteins of the RQC pathway and with mRNA coding regions, consistent with a factor that monitors the translation process. Depletion of Angel1 causes stabilization of reporter mRNAs that are targeted for RQC by the absence of stop codons, but not an mRNA targeted for nonsense-mediated decay. Angel1 catalytic activity is critical for its function in RQC, as a catalytic inactivating mutation causes loss of RQC function. We also identify N4BP2 as the human RQC endonuclease. Given the biochemical activity of Angel1 as a 2',3' cyclic phosphatase, our findings suggest that a rate-limiting step in RQC-mediated mRNA decay is the resolution of a cyclic phosphate, possibly one generated upon N4BP2 cleavage.

## Introduction

Faithful and accurate expression of the cell's repertoire of protein coding genes is vital to proper cellular function. However, certain cell contexts and problematic mRNA substrates can, if unresolved, lock up translational machinery in unproductive events or create potentially toxic non-functional protein products. Quality control pathways for these aberrant translation events are necessary to maintain the integrity of the proteome (Ermolaeva et al. 2015; Doma and Parker 2007; Chen et al. 2011; Lykke-Andersen and Bennett 2014). One such pathway is ribosome-associated quality control (RQC), which is promoted by local stalling of a ribosome during translation (Joazeiro 2019) and is sensed by a trailing ribosome colliding with the stalled ribosome (Simms et al. 2017). The collided ribosomes create a unique surface that is recognized by the E3 ubiquitin ligase ZNF598 (Hel2 in the budding yeast *Saccharomyces cerevisiae*) (Juszkiewicz et al. 2018; Ikeuchi et al. 2019). This activates a cascade of events that results in degradation of the nascent polypeptide as well as the mRNA (D'Orazio and Green 2021).

mRNAs targeted by RQC are broadly categorized into two pathways for historical reasons rather than any clear mechanistic distinction. One is No-Go Decay (NGD), which is defined by translational stalls that occur in the coding region (Doma and Parker 2006), for example due to strong RNA structures including G-quadruplexes (Bao et al. 2020; Endoh and Sugimoto 2016), certain amino-acid tracts (Huter et al. 2017), or oxidative damage (Simms et al. 2014). Another is Non-Stop Decay (NSD) in which the ribosome stalls at the end of the mRNA because it never encounters a stop codon (Frischmeyer et al. 2002; Van Hoof et al. 2002); this can occur due to

mRNA truncation (Pisareva et al. 2011) or an improper polyadenylation event, such as at a coding region cryptic poly(A) site, which leads to translation into the poly(A) tail causing a stall due to inefficient tRNA loading impairing translation elongation (Chandrasekaran et al. 2019). In either case, collided ribosomes are what appear to be sensed by the RQC system.

Our best understanding of RQC-targeted mRNA decay comes from budding yeast. It has been long understood that decay of NGD substrates in budding yeast involves endonucleolytic cleavage at the site of the stall (Doma and Parker 2006). Endonucleolytic cleavage is believed to also be an initiating event for NSD substrates (Glover et al. 2020), but cleavage would occur close to the mRNA 3' end which is technically difficult to monitor. The 5' RNA fragment is subsequently degraded in a process dependent on the exosome and its associated Ski complex, whereas the 3' fragment is degraded in a manner dependent on the 5'–3' exonuclease Xrn1 (Frischmeyer et al. 2002; Tsuboi et al. 2012). A recent study found that RQC mRNA substrates in budding yeast also undergo degradation independently of endonucleolytic cleavage in an Xrn1-dependent manner (D'Orazio et al. 2019).

The RQC-mediated mRNA decay pathway is poorly understood in mammals and is likely distinct from the pathway in budding yeast given that mammals lack an ortholog of Ski7, an important component of budding yeast NSD (Van Hoof et al. 2002). Ribosome collisions or pauses appear to be common in mammals and occur at predictable motifs (Han et al. 2020). Some evidence suggests the presence of cleaved native mRNAs, possibly generated by endonucleolytic cleavage during stall resolution (Ibrahim et al. 2018). Furthermore, NSD mRNA substrates have

been shown to be unstable in HeLa cells and require the ribosome rescue factors HBS1 and DOM34, and the Exosome-SKI complex for decay (Saito et al. 2013).

Recent studies have identified Cue2 in budding yeast—and its homolog NONU-1 in the worm *Caenorhabditis elegans*—as the endonuclease responsible for the initial cleavage event of NGD substrates (D’Orazio et al. 2019; Glover et al. 2020). Humans have a putative homolog of Cue2/NONU-1, called N4BP2, but its function in RQC has yet to be confirmed. Cue2 and NONU-1 share homology with endonucleases that cleave RNA in a divalent metal ion-independent manner and generate RNA fragments terminating in 2',3' cyclic phosphates (D’Orazio et al. 2019; Glover et al. 2020) rather than the 3'OH typically produced by divalent metal ion-dependent endonucleases. Indeed, endonucleolytic cleavage of RQC substrates was found to produce 5' hydroxylated 3' RNA fragments, consistent with a cleavage generating a 2',3' cyclic phosphate (Navickas et al. 2020).

RNAs terminating with 2',3' cyclic phosphates are common products of RNA cleavage or trimming. Yet, little is known about how this modification affects RNA metabolism. A recent study identified the human Angel2 and Angel1 proteins as 2',3' cyclic phosphatases (Pinto et al. 2020). The Angel protein family is conserved in eukaryotes and evolutionarily related to the catalytic CCR4 subunit of the CCR4-NOT deadenylase complex (Goldstrohm and Wickens 2008; Kurzik-Dumke and Zengerle 1996). Yet, Angel2 was not observed to possess deadenylase activity in biochemical assays, and instead both Angel1 and Angel2 were found to hydrolyze 2',3' cyclic phosphates (Pinto et al. 2020).

In this work, we identify the 2',3' cyclic phosphatase Angel1 as a factor that facilitates RQC-mediated mRNA decay in human cells. Angel1 associates with proteins known to be involved in RQC and with mRNA coding regions, including near sequences that are associated with ribosome stalling. Depletion of Angel1 and the human RQC endonuclease homolog N4BP2 causes stabilization of RQC reporter mRNAs targeted for NSD, and the catalytic activity of Angel1 is critical for this activity. These observations demonstrate that Angel1 functions in human RQC-mediated mRNA decay and suggest that a rate-limiting step of the pathway is removal of a 2',3' cyclic phosphate.

## **Results**

### **Angel1 associates with components of the RQC pathway**

To gain insight into possible functions for Angel1, we first established an assay to identify Angel1 protein binding partners. Using the Flp-In T-REx system, we constructed stable human embryonic kidney (HEK) 293 cell lines expressing N-terminally FLAG-tagged Angel1 under the control of a tetracycline-regulated promoter that we titrated to express Angel1 at close to endogenous levels (Supplementary Figure S1A; see also Materials and Methods). We performed immunoprecipitation (IP) against the FLAG-tag (Supplementary Figure S1B) and identified associated proteins by liquid chromatography followed by tandem mass spectrometry (LC-MS/MS). IPs were performed with or without prior RNase A treatment to help distinguish between RNA- and protein-mediated interactions. To identify interactions specific to Angel1, the IPs were normalized to IPs from a parental Flp-In T-REx cell line expressing no FLAG-tagged fusion protein and compared to a cell line expressing FLAG-tagged TOE1, a better understood DEDD-type deadenylase with a role in snRNA processing (Lardelli et al. 2017) (Figure 1A).

Among the most abundant proteins that specifically co-purified with FLAG-tagged Angel1 (Supplementary Table S1), was the mRNA cap-binding protein eIF4E, which, importantly, reproduces a previously described interaction (Gosselin et al. 2013). Other proteins that specifically co-purified with Angel1 included additional mRNP components (LARP4, LARP4B, DDX6, LSM14A, ATXN2, and PABPC), all components of the GATOR2 complex (MIOS, WDR24, WDR59, and SEH1L) involved in activation of mTORC1 (Cai et al. 2016), and components of a

complex important for cytoskeletal functions of neurons and synaptic plasticity (DISC1, NDE1 and NDEL1; Tropea et al. 2018).

A striking subset of Angel1-associated proteins were components of the RQC pathway (Figure 1A). These included RACK1, LTN1, ubiquitin, and all three components of the SKI complex, a cytoplasmic adapter and RNA helicase for the RNA exosome. With the exception of RACK1, these all associated with Angel1 in a manner resistant to RNase A treatment (Figure 1A), suggesting protein-mediated interactions that are independent of RNA. We confirmed the association of Angel1 with eIF4E and the SKIV2L subunit of the SKI complex by IP followed by immunoblotting (Figure 1B). Given the homology of Angel1 with 3' RNA processing factors and, in particular, its association with components of the RQC pathway, we explored the hypothesis that Angel1 is involved in quality control-dependent degradation of mRNAs associated with stalled ribosomes.

### **Angel1 associates with mRNA coding regions and sequence features correlated with stalled ribosomes**

Pursuing this hypothesis, we were interested in understanding what RNA transcripts and sequence motifs Angel1 interacts with, reasoning that it may show preference for regions of transcripts associated with stalled ribosomes. To that end, we performed enhanced cross-linking and immunoprecipitation followed by sequencing (eCLIP-seq) (Van Nostrand et al. 2016). Two replicates of FLAG-Angel1 eCLIP-seq were performed on our Flp-In T-REx HEK293 cell lines expressing Angel1 at close to endogenous levels. We also performed eCLIP-seq with



the parental cell line as a background control. When evaluating differential enrichment of genes in IPs over input, we found high agreement between the two Angel1 eCLIP replicates (Figure 2A and Supplementary Figures 2A and 2B). Consistent with a factor that may monitor translation, Angel1 eCLIP reads were significantly enriched for coding regions of mRNAs and depleted for intronic regions (Figures 2B and 2C). Angel1 eCLIP also showed an enrichment for reads mapping to 5'UTRs (Figure 2C), another part of mRNAs engaged with ribosomal subunits and consistent with the association of Angel1 with eIF4E. Using an eCLIP-Seq analysis pipeline (Van Nostrand et al. 2016), we identified CLIP peaks for each replicate ( $p < 0.05$ ). Limiting the analysis to CLIP peaks that were reproducible between the two replicates (cutoff threshold  $p < 0.001$ ) showed a further increase in the percentage of peaks mapping to coding regions (Figure 2B).

Typically, nucleotide motifs for RNA binding proteins are identified by applying motif finding algorithms to the sequences of reproducible peaks. However, this analysis failed to produce strong nucleotide or codon motifs in Angel1-associated peaks. We reasoned that, if involved in RQC, Angel1 might be recruited to regions upstream or downstream of ribosome stalls and therefore examined regions within 50 nucleotides upstream and downstream of each peak. Motif analysis (Bailey et al. 2009) of these Angel1-associated regions revealed an abundance of guanosine-rich sequences (Supplementary Figure S2C) and several amino acid-coding motifs that have been associated with stalled ribosomes (Chyżyńska et al. 2021), including poly-glycine and poly-glutamate/aspartate—which were the two most significantly enriched motifs in the analysis—and, less enriched, poly-proline codons (Figure 2D). We also examined nucleotide content of regions around peaks and found that they contained, on average, higher GC content

than regions surrounding reads the control samples (Figure 2E) and were more likely to contain what are predicted to be stronger structures (Supplementary Figure S2D). Using a G-quadruplex prediction algorithm (Kikin et al. 2006), we found that regions around peaks were also predicted to more likely form G-quadruplexes (Figure 2F), a secondary structure element that has also been associated with ribosome stalling (Endoh and Sugimoto 2016). These associations are consistent with a factor involved in RQC and the wide variety of nucleotide and nascent oligopeptide sequences that may induce ribosome stalling.

### **Development of a human NSD assay**

While many factors involved in RQC-mediated mRNA degradation have been identified in budding yeast (D'Orazio et al. 2019; Van Hoof et al. 2002; Frischmeyer et al. 2002; Tsuboi et al. 2012) and in *C. elegans* (Glover et al. 2020), much less is known about factors that may mediate RQC-mediated mRNA decay in human cells (Saito et al. 2013). To establish an assay to monitor mRNA degradation in human cells mediated by RQC, we adapted the well-characterized  $\beta$ -globin mRNA pulse-chase system (Lykke-Andersen et al. 2000) by generating an NSD reporter mRNA with no stop codons. In this system, wild-type  $\beta$ -globin mRNA is highly stable with a half-life of over 600 minutes (Durand and Lykke-Andersen 2013). Removal of all stop codons created an unstable mRNA (BG-NSD) that is degraded at a rate faster than the well-characterized  $\beta$ -globin Nonsense-Mediated Decay (NMD) reporter mRNA containing a premature termination codon at position 39 (BG-NMD) (Durand et al. 2016) (Figures 3A and 3B). A single point mutation reintroducing a stop codon nine nucleotides upstream of the cleavage and polyadenylation site of the BG-NSD reporter (BG-NSD+Stop) rescued stability (Figures 3A and

3B). These substrates provide a platform for investigating the effects of human RQC machinery perturbations on substrate mRNA decay rates.

### **The human RQC endonuclease homolog N4BP2 contributes to NSD**

To further validate our NSD reporter mRNA we tested the effect of depleting SKIV2L, a component of the human SKI complex with an established function in RQC (Saito et al. 2013). As expected, SKIV2L depletion led to stabilization of the NSD reporter (Figure 4A and Supplementary Figures S3A and S3B). We next tested whether N4BP2, a mammalian homolog of the initiating RQC endonuclease Cue2/NONU-1, plays a role in targeting the NSD substrate for mRNA decay. Indeed, depletion of N4BP2 led to stabilization of the NSD reporter (Figure 4B and supplementary Figure S3A). In contrast to the other tested RQC factors, depletion of XRN1, using knock-down conditions that stabilize a cleavage intermediate in the NMD pathway (Franks et al. 2010) (Supplementary Figure S3B), did not stabilize the  $\beta$ -globin NSD substrate (Figure 4C), likely reflecting that our assay is unable to monitor the fate of the portion of the RNA located downstream of the ribosome stalling site. These observations identify SKIV2L and N4BP2 as rate-limiting for the degradation of the NSD reporter mRNA, and suggest that N4BP2 is the human ortholog of the *S. cerevisiae* and *C. elegans* RQC endonuclease.

### **Angel1 and its catalytic residues are limiting for NSD**

We next tested whether Angel1 contributes to human NSD. Indeed, siRNA-mediated depletion of Angel1 (Supplementary Figure S4A) resulted in stabilization of the  $\beta$ -globin NSD reporter mRNA (BG-NSD) (Figure 5A). This effect was observed for two independent siRNAs targeting

Angel1 (Supplementary Figure S4B). By contrast, depletion of Angel1 did not alter the stability of the  $\beta$ -globin NMD reporter mRNA (BG-NMD) (Figure 5B), showing that the effect is specific to turnover of the NSD substrate and not due to general repression of mRNA turnover or translation. Depletion of Angel1 also resulted in stabilization of an NSD reporter based on TPI mRNA (Supplementary Figure S4C), showing that the effect of Angel1 is not specific to a  $\beta$ -globin mRNA substrate.

Finally, to test whether Angel1 catalytic activity is important for its function in RQC, we generated an Angel1 protein containing a glutamate to alanine substitution previously shown to disrupt 2',3' cyclic phosphatase activity of the Angel1 homolog Angel2 (Pinto et al. 2020). Exogenous expression (Supplementary Figure S4D) of wild-type Angel1 partially rescued the effect of Angel1 depletion on NSD reporter stability (Figure 5C). By contrast, no rescue of activity was observed upon expression of the catalytically inactive Angel1 mutant (Angel1 EA) despite expression at equal levels as wild-type Angel1 (Supplementary Figure S4D), demonstrating that the activity of Angel1 in NSD depends on a central catalytic residue. Thus, the 2',3' cyclic phosphatase Angel1 and its catalytic activity is a rate-limiting component of RQC-mediated mRNA degradation in human cells.

## **Discussion**

The mechanism by which mRNAs subjected to RQC in human cells are targeted for degradation remains poorly understood. In this work, we present evidence that the 2',3' cyclic phosphatase Angel1 facilitates decay of mRNAs targeted for RQC. Indeed, Angel1 associates with proteins involved in RQC (Figure 1) and with coding regions of mRNAs, including RNA sequences that have been associated with translational stalling (Figure 2). Depletion of Angel1, as well as of N4BP2, a human homolog of the RQC endonuclease, stabilizes NSD reporter mRNAs, and a conserved catalytic residue is critical for this activity (Figures 3-5). Thus, Angel1, and its catalytic activity, contributes to RQC-mediated mRNA decay in human cells.

### **By what mechanism does Angel1 facilitate RQC?**

Angel1 is a homolog of EEP-type CCR4 deadenylases, but we (Supplementary Figure S5) and others (Pinto et al. 2020) have observed no deadenylase activity for human Angel proteins in biochemical assays. Instead, Angel1 and its homolog Angel2 were found to have activities as 2',3' cyclic phosphatases, dependent on a highly conserved catalytic glutamate residue (Pinto et al. 2020). Our observation that Angel1's activity in RQC is dependent on the same glutamate residue suggests that Angel1 functions as a cyclic phosphatase in the pathway. The initial cleavage of the RNA substrate during RQC occurs independently of divalent metal ions and leaves a 5'OH on the 3' RNA fragment (Navickas et al. 2020), suggesting that this cleavage generates a 2',3' cyclic phosphate on the 5' RNA fragment, consistent with the general biochemical activity of divalent metal ion-independent RNases with homology to N4BP2 (Yang 2011). Thus, the most likely function for Angel1 in RQC is the hydrolysis of this cyclic phosphate,

which may have to be resolved before the RNA can be degraded in the 3'–5' direction. Another potential substrate for a cyclic phosphatase in the RQC pathway could be the P-site tRNA which is left with a 2',3' cyclic phosphate after removal and degradation of the nascent polypeptide (Yip et al. 2019). However, the resolution of this phosphate seems a less likely candidate to explain the impact of Angel1 on mRNA degradation. While its demonstrated cyclic phosphatase activity is the most parsimonious explanation for the function of Angel1 in RQC, it cannot be ruled out that Angel1 functions by a different mechanism, such as by acting as a deadenylase despite the absence of such an activity *in vitro*. If the function of Angel1 in RQC is indeed as a cyclic phosphatase, this would describe an activity in RNA decay that is poorly understood but likely to be widespread. For example, U6 snRNA is known to be stabilized by a terminal 2',3' cyclic phosphate (Gu et al. 1997) and many RNA endonucleases generate 2',3' cyclic phosphates that may have to be resolved prior to exonucleolytic degradation of RNA fragments. While assays have been developed to monitor 2',3' cyclic phosphates *in vitro* and on stable non-coding RNAs (Gu et al. 1997; Shigematsu et al. 2018), an important goal of future studies will be to establish assays with sufficient sensitivity to monitor this modification when occurring transiently, such as during RNA decay.

### **Possible functions for Angel1 outside of RQC**

In addition to RQC factors, we also found association in our IP-MS/MS analysis of Angel1 with the Gator2 complex which, along with Sestrins and Gator1, is important for sensing amino acid deprivation and signaling through mTORC1 (Bar-Peled et al. 2013; Kowalsky et al. 2020). The association of Angel1 with these components suggests a potential role in sensing or modulating

amino acid deprivation. Given Angel1's biochemical activity, such a function could be related to tRNAs which can be cleaved during tRNA splicing and stress conditions to create 2',3' cyclic phosphate-containing species (Zillmann et al. 1991; Shigematsu and Kirino 2020). Furthermore, Angel1's association with DISC1-NDE1/NDEL1 suggests a function for Angel1 in cytoskeletal functions of neurons, although these proteins have no currently known role in RNA metabolism. Angel1 could also be involved in additional processes that involve cyclic phosphates, such as the metabolism of RNAs that feature cyclic phosphates during their life-cycles, including U6 snRNA (Gu et al. 1997), spliced tRNAs (Zillmann et al. 1991), or XBP1 mRNA (Jurkin et al. 2014).

### **What are the endogenous substrates of Angel1 and the human RQC pathway?**

While our reporter assays show that Angel1 is rate-limiting for decay of engineered human NSD substrates (Figure 5), our eCLIP experiments suggest that Angel1 associates broadly with protein coding regions of mRNAs (Figure 2). Indeed, depletion of RQC factors such as ZNF598 have shown broad, low-level, effects on the transcriptome (Tuck et al. 2020; Kalisiak et al. 2017; Weber et al. 2020; Sundaramoorthy et al. 2021). Identification of endogenous substrates of RQC has been generally unsuccessful with only a few potential examples, including the ER stress-induced XBP1, which in human cells is upregulated at the protein level upon depletion of ZNF598 (Han et al. 2020). These observations suggest broad pleiotropic effects of perturbations in this system, perhaps reflecting a process that occurs stochastically at individual mRNAs in normal conditions. We also observed association of Angel1 with mRNA 5'UTRs, which is consistent with the association of Angel1 with eIF4E and could potentially relate to mRNA

upstream open reading frames, or to the recently described RQC pathway detecting collisions between scanning pre-initiation complexes (Garshott et al. 2021).

### **Potential differences between the degradation of RQC mRNA substrates in budding yeast and humans**

Information on RQC-mediated mRNA decay in mammalian cells has so far been limited. A previous study identified the SKIV2L component of the SKI complex and ribosome recycling factors HBS1 and DOM34 as limiting for degradation of an NSD reporter mRNA (Saito et al. 2013). Here, in addition to Angel1, we identified the human RQC endonuclease homolog N4BP2 as a component of the pathway. In a potential departure from the yeast pathway, we observed no effect on degradation of our NSD reporter mRNA upon depletion of XRN1, despite using conditions that stabilized a cleavage intermediate of the NMD pathway (Franks et al. 2010). That XRN1 was not rate-limiting for degradation of the  $\beta$ -globin NSD substrate is perhaps not unexpected given the predicted position of the ribosome stall and endonucleolytic cleavage at the extreme 3' end of the tested substrate. However, this contrasts the predominance of Xrn1-mediated degradation over a cleavage-initiated pathway observed for NGD mRNA substrates in budding yeast (D'Orazio et al. 2019). This indicates that an endonucleolytic cleavage-mediated pathway is more predominant in mammalian cells, at least for the NSD substrate tested here, consistent with our observation that N4BP2 is rate-limiting for its degradation. Altogether, our study identifies Angel1 and N4BP2 as factors involved in human RQC-mediated mRNA decay, suggesting a rate-limiting role in RQC mRNA degradation for the hydrolysis of a 2',3' cyclic phosphate, possibly one generated upon the initial cleavage of the mRNA by N4BP2.



## **Acknowledgements**

We would like to thank the members of the Lykke-Andersen lab for their input and useful discussions. We also would like to thank the Triton Shared Compute Cluster (TSCC) at the San Diego Supercomputer Center for use of their hardware for alignments. Sequencing was conducted at the IGM Genomics Center, University of California, San Diego, La Jolla, CA. This work was supported by National Institutes of Health (NIH) grant R35 GM118069 awarded to JLA and NIH grant GM136994 awarded to EJB. G.W.Y. is supported by National Institutes of Health grants HG004659 and HG009889. G.W.Y. is supported by an Allen Distinguished Investigator Award, a Paul G. Allen Frontiers Group advised grant of the Paul G. Allen Family Foundation.

## **Declaration of conflicts of interests:**

G.W.Y. is a co-founder, member of the board of directors, equity holder, and paid consultant for Locanabio and BioInnovations. G.W.Y. is a Distinguished Visiting Professor at the National University of Singapore. The terms of these arrangements have been reviewed and approved by the University of California, San Diego in accordance with its conflict-of-interest policies. The authors declare no other competing interests.

## **Figure Legends**

### **FIGURE 1. Angel1 associates with components of the ribosome-associated quality control**

**pathway.** (A) Select proteins enriched in FLAG immune-complexes for FLAG-tagged Angel1 or TOE1 over an IP performed with a cell line expressing no FLAG-tagged protein as determined by mass spectrometry. IPs were performed in the absence (-) or presence (+) of RNase A. Fold enrichment was calculated as number of peptides per 10,000 total observed in the test IP over the negative control IP after adding a pseudocount of 1 to each identified protein. See also Supplementary Table S1. (B) Co-IP assays followed by Western blotting monitoring specific proteins associated with Angel1. Actin served as a negative control. Input: 10% of the total cell extract used for IP. \*: non-specific band.

### **FIGURE 2. Angel1 associates with coding regions of mRNAs and with sequences associated**

**with ribosomal stalling.** (A) Log<sub>2</sub> fold enrichment of IP reads over input compared between the two Flag-tagged Angel1 eCLIP replicates. Grey dots represent individual genes and the blue contour lines represent a 2D kernel density estimate. A Pearson correlation is shown. (B) Fraction of reads mapping to different functional regions of RNAs in control versus FLAG-tagged Angel1 input and eCLIP (IP) samples, and in reproducible peaks ( $p < 0.001$ ) between the two FLAG-tagged Angel1 eCLIP experiments. (C) Fold enrichment violin plot distributions separated by annotation. The line within each distribution represents the median averaged between each replicate and the median of each individual replicate is shown with a dot. IP1: light blue, IP2: dark blue. (D) Peptide motifs enriched in areas within 50 nucleotides upstream or downstream

of identified peaks as compared to areas around reads from the control sample. E-values are listed. The two leftmost shown motifs were the most highly enriched motifs in the MEME analysis. (E) GC content of sequences between 50 nucleotides upstream or downstream of identified Angel1 eCLIP peaks as compared to areas around reads from the control sample. \*:  $p < 2.2 \times 10^{-22}$  (KS-test). (F) Calculated guanosine quadruplex (G4) formation capacity of sequences between 50 nucleotides upstream or downstream of identified Angel1 eCLIP peaks as compared to areas around reads from the control sample. \*:  $p < 2.2 \times 10^{-22}$  (KS-test).

**FIGURE 3. Establishment of a human NSD reporter mRNA decay assay.** (A) Representative Northern blot of a pulse-chase mRNA decay assay in HeLa Tet-off cells monitoring degradation of BG-NSD+STOP, BG-NSD and BG-NMD mRNAs (Substrate) as compared with constitutively expressed  $\beta$ -globin-GAP3 control mRNA (Control). Numbers above lanes refer to hours after transcription shut-off of the substrate mRNAs by tetracycline. Bands were quantified and normalized to the constitutively expressed  $\beta$ -globin-GAP3 mRNA to calculate mRNA half-lives assuming first-order kinetics, which are given below the blot with standard error of the mean from three experiments. (B) Exponential decay plots of the experiment in panel A performed in triplicate ( $n=3$ ). Error bars represent standard error of the mean.

**FIGURE 4. Depletion of SKIV2L and N4BP2 stabilizes the human NSD reporter mRNA.** (A) Exponential decay plots of the BG-NSD substrate after depletion of known RQC factor SKIV2L. (B) Exponential decay plots of the BG-NSD substrate after depletion of N4BP2. (C) Exponential decay plots of the BG-NSD substrate after depletion of XRN1. Error bars represent standard

error of the mean (n=3). \*: p<0.05, calculated by one-tailed Student's t-test compared to the control knockdown targeting luciferase (siLuc).

**FIGURE 5. Angel1 and its catalytic activity is rate-limiting for the degradation of an NSD target mRNA.** (A) Exponential decay plots of the BG-NSD substrate after depletion of Angel1 or using a control siRNA (siLuc). (B) Exponential decay plots of a substrate containing a premature termination codon that is targeted for Nonsense-Mediated Decay (BG-NMD) after depletion of Angel1 or using a control siRNA. (C) Exponential decay plots of the BG-NSD substrate after depletion of Angel1 and complementing with exogenous Angel1 WT or catalytic inactive Angel1 EA. \*: p<0.05 calculated by a one-tailed Student's t-test. Error bars represent standard error of the mean (n=3).

## **Materials and Methods**

### **Antibodies**

Western blotting was performed with anti-FLAG (Sigma F7425; 1:1,000), anti-eIF4E (Cell Signaling Technologies 9742; 1:1,000), anti-SKIV2L (Thermo Fisher 11462-1-AP; 1:500), anti- $\beta$ -actin (Cell Signaling Technologies 4967; 1:1,000).

### **Plasmids**

Gibson assembly (New England Biolabs) was used to insert the coding region of Angel1 with an engineered N-terminal FLAG-tag into pcDNA5/FRT/TO and pcDNA3 to create pcDNA5/FRT/TO-FLAG-Angel1 WT and pcDNA3-FLAG-Angel1 WT. Site-directed mutagenesis (New England Biolabs, E0554S) was used to create an E298A catalytically inactivating mutation, generating pcDNA3-FLAG-Angel1 EA. Pulse-chase constructs were created from the previously described plasmid, pcTet2-BWT (Damgaard and Lykke-Andersen 2011). pcTet2-BG-NSD was created by 3 rounds of site-directed mutagenesis that removed all in-frame stop codons before the cleavage and polyadenylation site through deletion of a 70 bp region and 6 point mutations. A point mutation was introduced 10 nucleotides upstream of the cleavage and polyadenylation site to create a stop codon, generating pcTet2-BG-NSD+stop. pcTet2-BG-NMD was created by site-directed mutagenesis introducing a stop codon at codon 39 of pcTet2-BWT. pcBGAP3 was used as an internal control for pulse-chase experiments (Clement and Lykke-Andersen 2008). pcTet2-TPI-NSD was generated from pcTet2-TPI (Singh et al. 2008) using a synthesized double stranded gene fragment (IDT, gBlock) of the 3'UTR of pcTet2-TPI edited to remove all in-frame stop

codons. The gene fragment was used to replace the 3'UTR of pcTet2-TPI by Gibson assembly.

Plasmid sequences are available upon request.

### **Stable cell line construction and titration of FLAG-Angel1 levels**

pcDNA5/FRT/TO-FLAG-Angel1 WT was used to generate stable HEK Flp-In T-REx-293 cell lines (Invitrogen) according to the manufacturer's protocol, in which FLAG-Angel1 expression can be titrated with tetracycline. In the absence of an Angel1 antibody, we used an anti-FLAG antibody to estimate FLAG-Angel1 expression levels in comparison to FLAG-TOE1, which had been titrated to endogenous levels as monitored by a TOE1 antibody (Wagner et al. 2007; Lardelli et al. 2017). TOE1 is approximately 25 times more abundant than Angel1 in HeLa cells according to global mass spectrometry measurements (Nagaraj et al. 2011). We therefore titrated FLAG-Angel1 expression with tetracycline to match a level of approximately 1:25 relative to TOE1, which was reached at 5 ng/ml of tetracycline. This concentration of tetracycline was used in all experiments when expressing FLAG-Angel1 in the stable HEK Flp-In T-REx-293 line.

### **Cell growth and depletions**

Cells were maintained in Dulbecco's Modified Eagle Medium (DMEM, Gibco, 11965092) with 10% fetal bovine serum (Gibco, 10437028). Flp-In T-REx lines were induced with 5 ng/ml tetracycline 24 hours before harvest. Knockdowns were performed using 20 nM of small interfering RNAs (siRNAs) custom ordered from Horizon Discovery (Supplementary Table S2).

The control siRNA targeted luciferase mRNA. Knockdowns were performed with siLentFect reagent (Bio-Rad, 703362) according to the manufacturer's specifications.

### **Pulse-chase mRNA decay assays**

Hela Tet-off cells were plated at  $15 \times 10^4$  cells per well in a 6-well plate. siRNA-mediated knockdowns were performed at 72 hours and 24 hours prior to cell harvest. In addition, 48 hours prior to cell harvest, cells were transfected with 0.5  $\mu\text{g}$  of the test construct (pcTet2-BG-NSD, -BG-NSD+Stop, or -BG-NMD), 0.5  $\mu\text{g}$  of pcDNA3-based Angel1 addback construct (if applicable), 0.1  $\mu\text{g}$  of a pcBGAP3 loading control plasmid, and empty pcDNA3 plasmid stuffer to a total of 2  $\mu\text{g}$ . Cells were maintained with 50 ng/ml tetracycline to prevent expression from the test plasmid. 72 hours after the initial siRNA transfection, cells were rinsed with PBS, and transcription from the test plasmids was pulsed by addition of 2 ml of fresh medium free of tetracycline for 6 hours. Medium was subsequently replaced with DMEM/10% FBS containing 1,000 ng/ml tetracycline to shut off test plasmid transcription and cells were collected every 2 hours thereafter in Trizol reagent (Thermo Fisher, 15596026). RNA was isolated and substrate levels were analyzed by Northern blotting as previously described (Clement and Lykke-Andersen 2008).

### **Immunoprecipitation assays**

Flp-In T-REx lines expressing FLAG-tagged Angel1, FLAG-tagged TOE1, or no FLAG-tagged fusion protein were grown to approximately 50% confluency and induced with 5 ng/ml tetracycline for 24 hours. Cells were harvested by scraping into ice cold PBS and flash frozen in liquid nitrogen.

Pellets were resuspended in isotonic lysis buffer (50 mM Tris-HCl pH 7.5, 150 mM NaCl, 0.2 mM EDTA, 0.5% Triton X-100) with 80 units/ml RNaseOUT (Thermo Fisher, 10777019) or 125 µg/ml RNase A (Sigma, R4875), and 1 tablet/10 ml of protease inhibitor (Thermo Fisher, 88666) for 10 minutes on ice. Lysates were spun down at 20,000 *g* for 15 minutes at 4°C. FLAG peptide (ApexBio, A6002) was added to lysates to a concentration of 1 µg/ml to reduce non-specific interactions. Samples were incubated with pre-washed anti-FLAG M2 agarose beads (Sigma, A2220) for 2 hours at 4°C with rotation. Beads were washed 9 times with NET2 buffer (10 mM Tris-HCl pH 7.5, 150 mM NaCl, 0.1% Triton X-100). Protein was eluted by treating beads three times for 30 minutes at 4°C with NET2 containing 200 µg/ml FLAG peptide and elutions were subsequently pooled. Samples from input, the unbound fraction, and elution were separated by gel electrophoresis and visualized by silver staining (Thermo Fisher, 24580) according to the manufacturer's protocol. Protein amounts for deadenylation assays were estimated against BSA standards (New England Biolabs, B9000S).

### **Mass Spectrometry analysis**

In brief, the Immunoprecipitated samples were in-solution digested overnight at 37 °C in 400 ng of mass spectrometry grade trypsin (Promega) enzyme. The digestion was stopped by adding formic acid to the 0.5% final concentration. The digested peptides were desalted by using C18 StageTips and were transferred to a fresh tubes and then vacuum dried. The vacuum-dried peptides were resuspended in 5% formic acid/5% acetonitrile buffer and added to the vials for mass spectrometry analysis. Samples were analyzed with duplicate injections by LC-MS-MS using EASY-nLC 1000 liquid chromatography connected with Q-Exactive mass spectrometer



(Thermo Scientific) as described previously (Sundaramoorthy et al. 2017) with some modification as follows. The peptides were eluted using the 60 min acetonitrile gradient (45 min 2%–30% ACN gradient followed by 5 min 30%– 60% ACN gradient, a 2 min 60–95% ACN gradient, and a final 8 min isocratic column equilibration step at 0% ACN) at a 250 nl/min flow rate. All the gradient mobile phases contained 0.1% formic acid. The data dependent analysis (DDA) was done using the top 10 method with a positive polarity, scan range of 400–1800 m/z, a 70,000 resolution, and an AGC target of 3e6. A dynamic exclusion time of 20 s was implemented and unassigned; singly charged and charge states above 6 were excluded for the data dependent MS/MS scans. The MS2 scans were triggered with a minimum AGC target threshold of 1e5 and with a maximum injection time of 60 ms. The peptides were fragmented using a normalized collision energy (NCE) setting of 25. Apex trigger and peptide match settings were disabled. RAW files were processed, searched, and analyzed essentially as described previously (Reinke et al. 2017). To calculate the fold enrichment of individual proteins in the Angel1 IP over the matched FLAG control, the number of peptides for each protein were normalized to counts per 10,000 in the total count for each sample, and the normalized counts for Angel1 IP were divided by normalized counts for the control after adding a pseudocount of 1 to every normalized peptide count to prevent division by zero errors. All experiment related RAW mass-spectrometry data files were deposited at the MassIVE repository using the accession identifier MassIVE: MSV000089129.

### **eCLIP assays**

Flp-In TREx lines expressing FLAG-tagged Angel1 or no FLAG-tagged fusion protein were grown to approximately 50% confluency and induced with 5 ng/ml tetracycline for 24 hours. Cells were crosslinked to preserve protein-RNA interactions by treatment with UV (Stratalinker, 254 nm, 400 mJ/cm<sup>2</sup>, on ice). One sample was not exposed to UV as a no-crosslink control. eCLIP library preparation was performed as previously detailed (Van Nostrand et al. 2017). Samples were mapped to the hg37 human genome and features from the Gencode 19 annotation were counted with featureCounts (Liao et al. 2014). Reads were annotated with a Yeo lab annotation pipeline (Annotator v0.0.13). Fold enrichment was calculated as enrichment of IP reads over input reads for genes with mapped reads in the input condition above a threshold. Areas 50 nucleotides upstream and downstream from peaks were extracted with custom python scripts that used transcripts tagged as Appris principal (Rodriguez et al. 2013) to limit genes to one transcript. In cases where genes had multiple principal transcripts, the longest transcript was selected. G/C content was calculated with custom scripts for those regions. G quadruplex formation potential was measured for those sequences using QGRS (Kikin et al. 2006). Significance was tested with a Kolmogorov-Smirnov (KS) test. Sequencing data have been deposited into the Gene Expression Omnibus (GEO) under accession number GSE199650.

### **RT-qPCR assays**

After total RNA isolation from cells, reverse transcription was performed using Superscript III (Thermo Fisher, 18080044) according to manufacturer's protocol. qPCR was performed with a master mix (Thermo Fisher, 4385612) and using a Quantstudio 3 machine according to

manufacturer specifications. Angel1 qPCR was carried out using pre-validated primers (Bio-Rad, 10025636). All other qPCR primer pairs are listed in Supplementary Table S2.

### **Deadenylation assay**

A custom poly-A RNA substrate terminating in 20 adenosines (Dharmacon) and a DNA loading control also terminating in 20 adenosines (IDT) (Supplementary Table S2) were 5' labelled with [ $\gamma$ - $^{32}$ P]-ATP (PerkinElmer) using T4 poly-nucleotide kinase (NEB) according to manufacturer's protocol. The deadenylation assay was adapted from a previously described protocol (Wagner et al. 2007). Approximately 50 nM of the indicated protein was added to approximately 5,000 CPM each of DNA loading control and RNA substrate and incubated at 37°C in deadenylation buffer (20mM HEPES, pH7.4, 2mM MgCl<sub>2</sub>, 0.1 mg/ml bovine serum albumin, 1 mM spermidine, 0.1% Igepal CA-630 (Sigma), 0.5 units/ $\mu$ l RNase-Out, and 0.5  $\mu$ g/ $\mu$ l yeast total RNA). Formamide loading buffer was added to stop the reaction and samples were separated in a 9% polyacrylamide-6M urea denaturing gel. The gel was dried and imaged using a phosphorimager.

## Supplementary figure legends

### **SUPPLEMENTARY FIGURE S1. FLAG-Angel1 HEK293 Flp-In T-REx cell line validation. (A)**

Western blot showing expression of FLAG-Angel1 WT with titration of tetracycline (Tet) as indicated above lanes. The parental Flp-In T-REx line expressing no fusion protein serves as a negative control (FLAG-only), and Flp-In T-REx expressing FLAG-TOE1 at near endogenous levels was included as a reference. B-Actin was used as a loading control. \*: non-specific bands. (B) Silver-stained SDS-PAGE gel examining protein from FLAG-Angel1-WT IPs. An input sample of 10% of the total cell extract used for the IP (Input), a sample from the remaining lysate after IP containing unbound proteins (Unbound), and a sample of the pooled elutions (Elution) were run. A control IP using a Flp-In T-REx line expressing no fusion protein (FLAG) was run alongside. \*: denotes the antibody heavy and light chain.

**SUPPLEMENTARY FIGURE S2. Extended eCLIP analysis. (A and B)** Log<sub>2</sub> fold enrichment of IP reads over input compared between either Flag-tagged Angel1 eCLIP replicate and the parental Flag control. Grey dots represent individual genes and the blue contour lines represent a 2D kernel density estimate. Pearson correlations are shown. (C) Logo plots of top three enriched nucleotide motifs identified by MEME analysis of sequences within 50 nucleotides upstream or downstream of Angel1 CLIP peaks as compared to sequences within 50 nucleotides of mapped reads in the FLAG input sample. E-values are displayed above each plot. (D) Box plots comparing predicted mean free energy (MFE) calculated by RNAfold for regions within 50 nucleotides upstream or downstream of Angel1 CLIP peaks and within 50 nucleotides of

mapped reads in the FLAG input sample. Lower MFE scores are associated with stronger predicted secondary structure. \*: p-value < 2.2e-22 (KS-test).

**SUPPLEMENTARY FIGURE S3. Validation of siRNA-mediated depletions.** (A) Relative expression of knockdown targets compared to a control knockdown (siLuc) obtained from RT-qPCR. Error bars represent standard error of the mean (n=3). Comparisons between each knockdown and its control had a p-value < 0.05 as calculated by a one-tailed Student's t-test. (B) Western blots examining levels of SKIV2L and XRN1 proteins after siRNA-mediated knockdown (KD) in triplicate or knockdown with a non-targeting control siRNA (Ctrl).  $\beta$ -Actin is shown as a loading control.

**SUPPLEMENTARY FIGURE S4. Additional BG-NSD validation.** (A) Relative expression of Angel1 mRNA levels determined by RT-qPCR for two independent Angel1 siRNAs compared to a non-targeting control (siLuc). Comparisons between each knockdown and its control had a p-value of < 0.05 as calculated by a one-tailed Student's t-test. Error bars represent standard error of the mean (n=3). siRNA#1, which targets endogenous but not exogenous Angel1, was used for all other depletions. (B) Exponential decay graphs of pulse-chase mRNA decay experiments using the BG-NSD substrate with depletion using the Angel1-targeting siRNAs shown in panel A and siLuc siRNA. (C) Exponential decay graphs of pulse-chase mRNA decay experiments using the TPI-NSD substrate with depletion of Angel1 or a non-targeting control. Error bars represent standard error of the mean. \*: p-value < 0.05. n=3. (D) A Western blot examining total protein from HeLa Tet-off cells either depleted by a non-targeting siRNA (siLuc) or an siRNA targeting

endogenous Angel1 (siAngel1). Lanes 3 and 4 represent cells that were transfected with constructs expressing siRNA-resistant active (WT) or catalytically dead (EA) FLAG-Angel1 to complement depletion.  $\beta$ -Actin is shown as a loading control.

**SUPPLEMENTARY FIGURE S5. Angel1 shows no activity in a deadenylation assay.**

Phosphorimager scan of a 5'  $^{32}$ P-labelled poly-A RNA substrate incubated with the indicated active (WT) or catalytically dead (DEAA, EA) proteins ( $\approx$ 50nM) for the indicated amounts of time and subsequently separated in a denaturing gel. A 5'  $^{32}$ P-labelled DNA substrate was included in each reaction as an internal loading control.

## References

- Bailey TL, Boden M, Buske FA, Frith M, Grant CE, Clementi L, Ren J, Li WW, Noble WS. 2009. MEME SUITE: tools for motif discovery and searching. *Nucleic Acids Res* **37**: W202–W208.
- Bao C, Loerch S, Ling C, Korostelev AA, Grigorieff N, Ermolenko DN. 2020. mRNA stem-loops can pause the ribosome by hindering A-site tRNA binding. *Elife* **9**: 1–67.
- Bar-Peled L, Chantranupong L, Cherniack AD, Chen WW, Ottina KA, Grabiner BC, Spear ED, Carter SL, Meyerson M, Sabatini DM. 2013. A Tumor Suppressor Complex with GAP Activity for the Rag GTPases That Signal Amino Acid Sufficiency to mTORC1. *Science (80- )* **340**: 1100–1106.
- Cai W, Wei Y, Jarnik M, Reich J, Lilly MA. 2016. The GATOR2 Component Wdr24 Regulates TORC1 Activity and Lysosome Function ed. H. Kramer. *PLoS Genet* **12**: e1006036.
- Chandrasekaran V, Juszkievicz S, Choi J, Puglisi JD, Brown A, Shao S, Ramakrishnan V, Hegde RS. 2019. Mechanism of ribosome stalling during translation of a poly(A) tail. *Nat Struct Mol Biol* **26**: 1132–1140.
- Chen B, Retzlaff M, Roos T, Frydman J. 2011. Cellular strategies of protein quality control. *Cold Spring Harb Perspect Biol* **3**: 1–14.
- Chyżyńska K, Labun K, Jones C, Grellscheid SN, Valen E. 2021. Deep conservation of ribosome stall sites across RNA processing genes. *NAR Genomics Bioinforma* **3**: 1–13.
- Clement SL, Lykke-Andersen J. 2008. A Tethering Approach to Study Proteins that Activate mRNA Turnover in Human Cells. *Methods Mol Biol* **419**: 121–133.
- D’Orazio KN, Green R. 2021. Ribosome states signal RNA quality control. *Mol Cell* **81**: 1372–1383.

D’Orazio KN, Wu CC-C, Sinha N, Loll-Krippleber R, Brown GW, Green R. 2019. The endonuclease Cue2 cleaves mRNAs at stalled ribosomes during No Go Decay. *Elife* **8**.

Damgaard CK, Lykke-Andersen J. 2011. Translational coregulation of 5’TOP mRNAs by TIA-1 and TIAR. *Genes Dev* **25**: 2057–2068.

Doma MK, Parker R. 2006. Endonucleolytic cleavage of eukaryotic mRNAs with stalls in translation elongation. *Nature* **440**: 561–564.

Doma MK, Parker R. 2007. RNA Quality Control in Eukaryotes. *Cell* **131**: 660–668.

Durand S, Franks TM, Lykke-Andersen J. 2016. Hyperphosphorylation amplifies UPF1 activity to resolve stalls in nonsense-mediated mRNA decay. *Nat Commun* **7**: 1–12.

Durand S, Lykke-Andersen J. 2013. Nonsense-mediated mRNA decay occurs during eIF4F-dependent translation in human cells. *Nat Struct Mol Biol* **20**: 702–709.

Endoh T, Sugimoto N. 2016. Mechanical insights into ribosomal progression overcoming RNA G-quadruplex from periodical translation suppression in cells. *Sci Rep* **6**: 22719.

Ermolaeva MA, Dakhovnik A, Schumacher B. 2015. Quality control mechanisms in cellular and systemic DNA damage responses. *Ageing Res Rev* **23**: 3–11.

Franks TM, Singh G, Lykke-Andersen J. 2010. Upf1 ATPase-Dependent mRNP Disassembly Is Required for Completion of Nonsense-Mediated mRNA Decay. *Cell* **143**: 938–950.

Frischmeyer PA, Van Hoof A, O’Donnell K, Guerrerio AL, Parker R, Dietz HC. 2002. An mRNA surveillance mechanism that eliminates transcripts lacking termination codons. *Science (80- )* **295**: 2258–2261.

Garshott DM, An H, Sundaramoorthy E, Leonard M, Vicary A, Harper JW, Bennett EJ. 2021. iRQC, a surveillance pathway for 40S ribosomal quality control during mRNA translation



initiation. *Cell Rep* **36**: 109642.

Glover ML, Burroughs AM, Monem PC, Egelhofer TA, Pule MN, Aravind L, Arribere JA. 2020.

NONU-1 Encodes a Conserved Endonuclease Required for mRNA Translation Surveillance.

*Cell Rep* **30**: 4321-4331.e4.

Goldstrohm AC, Wickens M. 2008. Multifunctional deadenylase complexes diversify mRNA

control. *Nat Rev Mol Cell Biol* **9**: 337–344.

Gosselin P, Martineau Y, Morales J, Czjzek M, Glippa V, Gauffeny I, Morin E, Le Corguillé G,

Pyronnet S, Cormier P, Cosson B, Le Corguill G, Pyronnet S, Cormier P, Cosson B. 2013.

Tracking a refined eIF4E-binding motif reveals Angel1 as a new partner of eIF4E. *Nucleic*

*Acids Res* **41**: 7783–7792.

Gu J, Shumyatsky G, Makan N, Reddy R. 1997. Formation of 2',3'-cyclic phosphates at the 3' end

of human U6 small nuclear RNA in vitro. *J Biol Chem* **272**: 21989–21993.

Han P, Shichino Y, Schneider-Poetsch T, Mito M, Hashimoto S, Udagawa T, Kohno K, Yoshida M,

Mishima Y, Inada T, Iwasaki S. 2020. Genome-wide Survey of Ribosome Collision. *Cell Rep*

**31**: 107610.

Huter P, Arenz S, Bock L V., Graf M, Frister JO, Heuer A, Peil L, Starosta AL, Wohlgemuth I, Peske

F, Nováček J, Berninghausen O, Grubmüller H, Tenson T, Beckmann R, Rodnina M V.,

Vaiana AC, Wilson DN. 2017. Structural Basis for Polyproline-Mediated Ribosome Stalling

and Rescue by the Translation Elongation Factor EF-P. *Mol Cell* **68**: 515-527.e6.

Ibrahim F, Maragkakis M, Alexiou P, Mourelatos Z. 2018. Ribothrypsis, a novel process of

canonical mRNA decay, mediates ribosome-phased mRNA endonucleolysis. *Nat Struct Mol*

*Biol* **25**: 302–310.

- Ikeuchi K, Tesina P, Matsuo Y, Sugiyama T, Cheng J, Saeki Y, Tanaka K, Becker T, Beckmann R, Inada T. 2019. Collided ribosomes form a unique structural interface to induce Hel2-driven quality control pathways. *EMBO J* **38**: e100276.
- Joazeiro CAP. 2019. Mechanisms and functions of ribosome-associated protein quality control. *Nat Rev Mol Cell Biol* **20**: 368–383.
- Jurkin J, Henkel T, Nielsen AF, Minnich M, Popow J, Kaufmann T, Heindl K, Hoffmann T, Busslinger M, Martinez J. 2014. The mammalian tRNA ligase complex mediates splicing of XBP1 mRNA and controls antibody secretion in plasma cells. *EMBO J* **33**: 2922.
- Juzskiewicz S, Chandrasekaran V, Lin Z, Kraatz S, Ramakrishnan V, Hegde RS. 2018. ZNF598 Is a Quality Control Sensor of Collided Ribosomes. *Mol Cell* **72**: 469–481.
- Kalisiak K, Kuliński TM, Tomecki R, Cysewski D, Pietras Z, Chlebowski A, Kowalska K, Dziembowski A. 2017. A short splicing isoform of HBS1L links the cytoplasmic exosome and SKI complexes in humans. *Nucleic Acids Res* **45**: 2068–2080.
- Kikin O, D'Antonio L, Bagga PS. 2006. QGRS Mapper: A web-based server for predicting G-quadruplexes in nucleotide sequences. *Nucleic Acids Res* **34**: W676–W682.
- Kowalsky AH, Namkoong S, Mettetal E, Park HW, Kazyken D, Fingar DC, Lee JH. 2020. The GATOR2–mTORC2 axis mediates Sestrin2-induced AKT Ser/Thr kinase activation. *J Biol Chem* **295**: 1769.
- Kurzik-Dumke U, Zengerle A. 1996. Identification of a novel *Drosophila melanogaster* gene, angel, a member of a nested gene cluster at locus 59F4,5. *Biochim Biophys Acta* **1308**: 177–181.
- Lardelli RM, Schaffer AE, C Eggens VR, Zaki MS, Grainger S, Sathe S, Van Nostrand EL,

- Schlachetzki Z, Rosti B, Akizu N, Scott E, Silhavy JL, Dean Heckman L, Ozgur Rosti R, Dikoglu E, Gregor A, Guemez-Gamboa A, Musaev D, Mande R, Widjaja A, Shaw TL, Markmiller S, Marin-Valencia I, Davies JH, de Meirleir L, Kayserili H, Altunoglu U, Louise Freckmann M, Warwick L, Chitayat D, Blaser S, Okay Çağlayan A, Bilguvar K, Per H, Fagerberg C, Christesen HT, Kibaek M, Aldinger KA, Manchester D, Matsumoto N, Muramatsu K, Saitsu H, Shiina M, Ogata K, Foulds N, Dobyns WB, Chi NC, Traver D, Spaccini L, Maria Bova S, Gabriel SB, Gunel M, Maria Valente E, Nassogne M-C, Bennett EJ, Yeo GW, Baas F, Lykke-Andersen J, Gleeson JG. 2017. Biallelic mutations in the 3' exonuclease TOE1 cause pontocerebellar hypoplasia and uncover a role in snRNA processing. *Nat Genet* **49**: 457–464.
- Liao Y, Smyth GK, Shi W. 2014. featureCounts: an efficient general purpose program for assigning sequence reads to genomic features. *Bioinformatics* **30**: 923–930.
- Lykke-Andersen J, Bennett EJ. 2014. Protecting the proteome: Eukaryotic cotranslational quality control pathways. *J Cell Biol*.
- Lykke-Andersen J, Shu M-D, Steitz JA. 2000. Human Upf Proteins Target an mRNA for Nonsense-Mediated Decay When Bound Downstream of a Termination Codon. *Cell* **103**: 1121–1131.
- Nagaraj N, Wisniewski JR, Geiger T, Cox J, Kircher M, Kelso J, Pääbo S, Mann M. 2011. Deep proteome and transcriptome mapping of a human cancer cell line. *Mol Syst Biol* **7**.
- Navickas A, Chamois S, Saint-Fort R, Henri J, Torchet C, Benard L. 2020. No-Go Decay mRNA cleavage in the ribosome exit tunnel produces 5'-OH ends phosphorylated by Trl1. *Nat Commun* **11**: 122.
- Pinto PH, Kroupova A, Schleiffer A, Mechtler K, Jinek M, Weitzer S, Martinez J. 2020. ANGEL2 is a member of the CCR4 family of deadenylases with 2',3'-cyclic phosphatase activity.

*Science* **369**: 524–530.

Pisareva VP, Skabkin MA, Hellen CUT, Pestova T V, Pisarev A V. 2011. Dissociation by Pelota, Hbs1 and ABCE1 of mammalian vacant 80S ribosomes and stalled elongation complexes. *EMBO J* **30**: 1804–17.

Reinke AW, Mak R, Troemel ER, Ben EJ. 2017. In vivo mapping of tissue- and subcellular-specific proteomes in *Caenorhabditis elegans*. *Sci Adv* **3**.

Rodriguez JM, Maietta P, Ezkurdia I, Pietrelli A, Wesselink JJ, Lopez G, Valencia A, Tress ML. 2013. APPRIS: annotation of principal and alternative splice isoforms. *Nucleic Acids Res* **41**: D110.

Saito S, Hosoda N, Hoshino SI. 2013. The Hbs1-Dom34 protein complex functions in non-stop mRNA decay in mammalian cells. *J Biol Chem* **288**: 17832–17843.

Shigematsu M, Kawamura T, Kirino Y. 2018. Generation of 2',3'-Cyclic Phosphate-Containing RNAs as a Hidden Layer of the Transcriptome. *Front Genet* **9**: 562.

Shigematsu M, Kirino Y. 2020. Oxidative stress enhances the expression of 2',3'-cyclic phosphate-containing RNAs. *RNA Biol* **17**: 1060–1069.

Simms CL, Hudson BH, Mosior JW, Rangwala AS, Zaher HS. 2014. An active role for the ribosome in determining the fate of oxidized mRNA. *Cell Rep* **9**: 1256–64.

Simms CL, Yan LL, Zaher HS. 2017. Ribosome Collision Is Critical for Quality Control during No-Go Decay. *Mol Cell* **68**: 361-373.e5.

Singh G, Rebbapragada I, Lykke-Andersen J. 2008. A competition between stimulators and antagonists of Upf complex recruitment governs human nonsense-mediated mRNA decay. *PLoS Biol* **6**: 860–871.

Sundaramoorthy E, Leonard M, Mak R, Liao J, Fulzele A, Bennett EJ. 2017. ZNF598 and RACK1 Regulate Mammalian Ribosome-Associated Quality Control Function by Mediating Regulatory 40S Ribosomal Ubiquitylation. *Mol Cell* **65**: 751-760.e4.

Sundaramoorthy E, Ryan AP, Fulzele A, Leonard M, Daugherty MD, Bennett EJ. 2021. Ribosome quality control activity potentiates vaccinia virus protein synthesis during infection. *J Cell Sci* **134**.

Tropea D, Hardingham N, Millar K, Fox K. 2018. Mechanisms underlying the role of DISC1 in synaptic plasticity. *J Physiol* **596**: 2747–2771.

Tsuboi T, Kuroha K, Kudo K, Makino S, Inoue E, Kashima I, Inada T. 2012. Dom34:Hbs1 Plays a General Role in Quality-Control Systems by Dissociation of a Stalled Ribosome at the 3' End of Aberrant mRNA. *Mol Cell* **46**: 518–529.

Tuck AC, Rankova A, Arpat AB, Liechti LA, Hess D, Iesmantavicius V, Castelo-Szekely V, Gatfield D, Bühler M. 2020. Mammalian RNA Decay Pathways Are Highly Specialized and Widely Linked to Translation. *Mol Cell* **77**: 1222-1236.e13.

Van Hoof A, Frischmeyer PA, Dietz HC, Parker R. 2002. Exosome-mediated recognition and degradation of mRNAs lacking a termination codon. *Science (80- )* **295**: 2262–2264.

Van Nostrand EL, Nguyen TB, Gelboin-Burkhart C, Wang R, Blue SM, Pratt GA, Louie AL, Yeo GW. 2017. Robust, Cost-Effective Profiling of RNA Binding Protein Targets with Single-end Enhanced Crosslinking and Immunoprecipitation (seCLIP). pp. 177–200, Humana Press, New York, NY.

Van Nostrand EL, Pratt GA, Shishkin AA, Gelboin-Burkhart C, Fang MY, Sundararaman B, Blue SM, Nguyen TB, Surka C, Elkins K, Stanton R, Rigo F, Guttman M, Yeo GW. 2016. Robust

transcriptome-wide discovery of RNA-binding protein binding sites with enhanced CLIP (eCLIP). *Nat Methods* **13**: 508–514.

Wagner E, Clement SL, Lykke-Andersen J. 2007. An unconventional human Ccr4-Caf1 deadenylase complex in nuclear cajal bodies. *Mol Cell Biol* **27**: 1686–1695.

Weber R, Chung MY, Keskeny C, Zinnall U, Landthaler M, Valkov E, Izaurralde E, Igreja C. 2020. 4EHP and GIGYF1/2 Mediate Translation-Coupled Messenger RNA Decay. *Cell Rep* **33**: 108262.

Yang W. 2011. Nucleases: Diversity of structure, function and mechanism. *Q Rev Biophys* **44**: 1–93.

Yip MCJ, Keszei AFA, Feng Q, Chu V, McKenna MJ, Shao S. 2019. Mechanism for recycling tRNAs on stalled ribosomes. *Nat Struct Mol Biol* **26**: 343–349.

Zillmann M, Gorovsky MA, Phizicky EM. 1991. Conserved mechanism of tRNA splicing in eukaryotes. *Mol Cell Biol* **11**: 5410.

**Figure 1.** Angel 1 associates with components of the ribosome-associated quality control pathway.

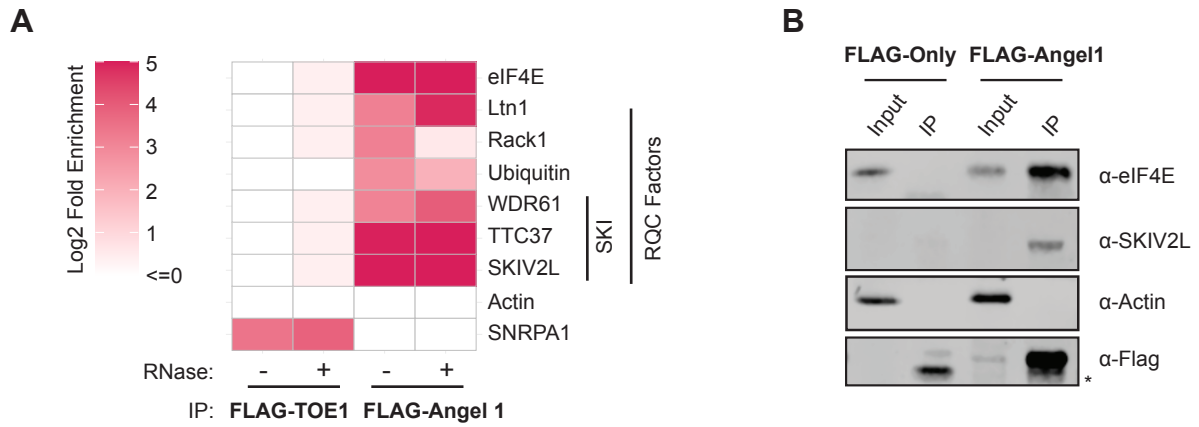

**Figure 2.** Angel 1 associates with coding regions of mRNAs and with sequences associated with ribosomal stalling

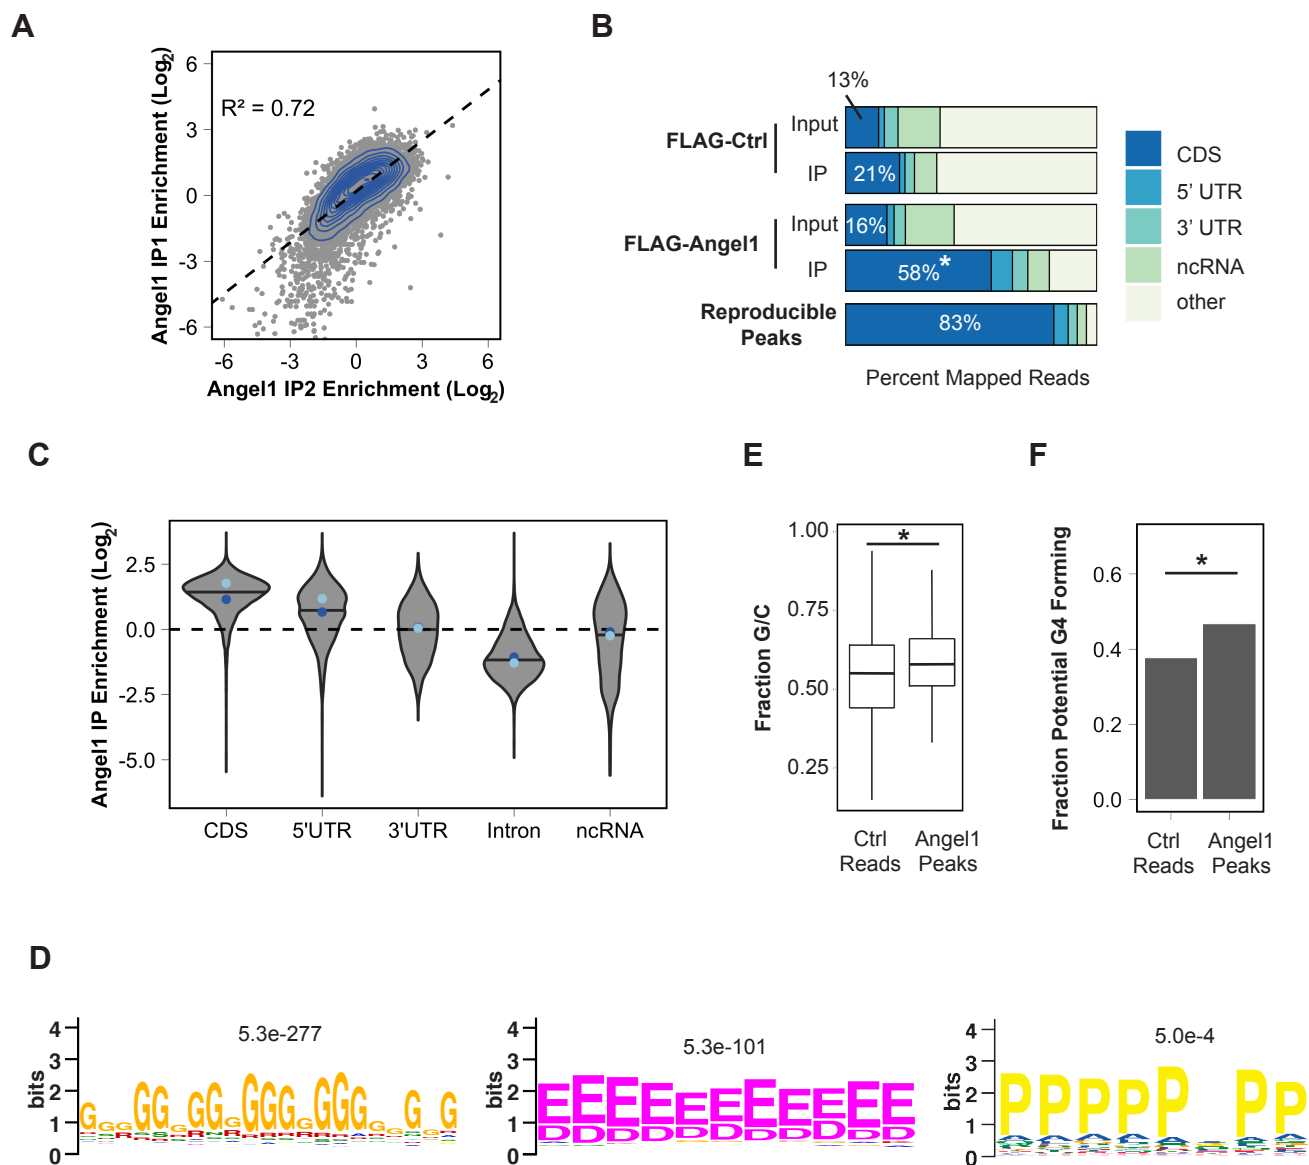



**Figure 3.** Establishment of a human NSD reporter mRNA decay assay

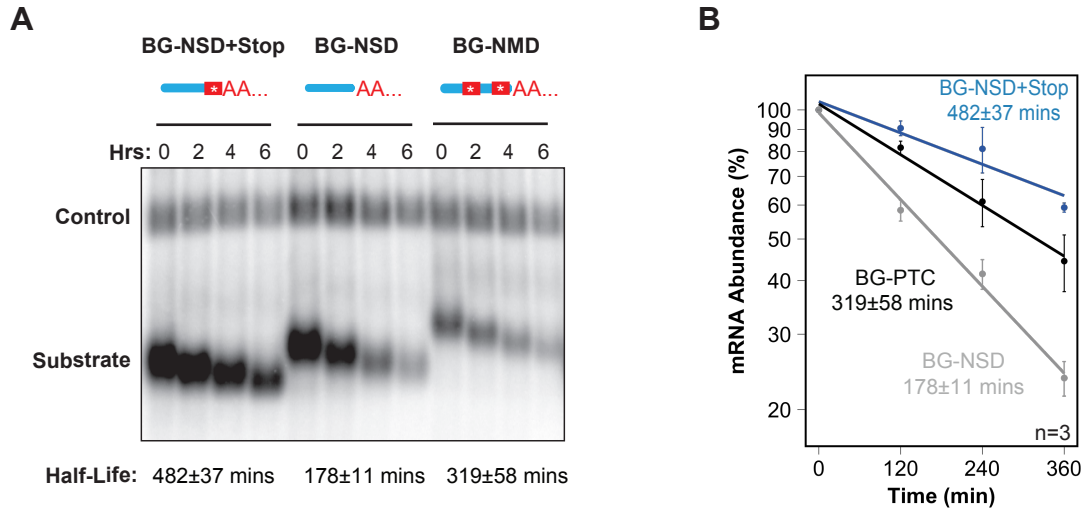

**Figure 4.** Depletion of SKIV2L and N4BP2 stabilizes the human NSD reporter mRNA.

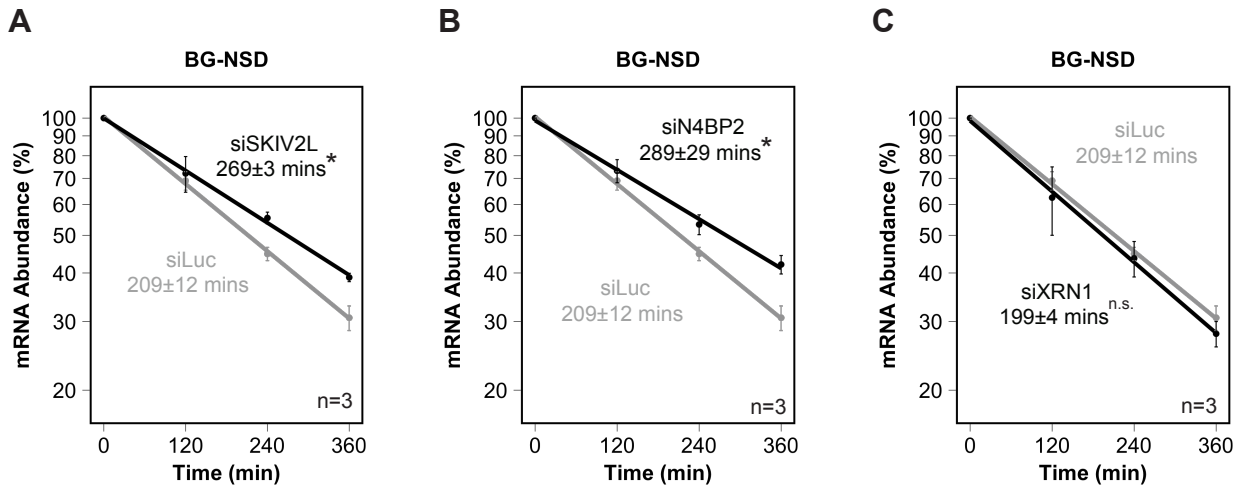

**Figure 5.** Angel 1 and its catalytic activity is rate-limiting for the degradation of an NSD target mRNA

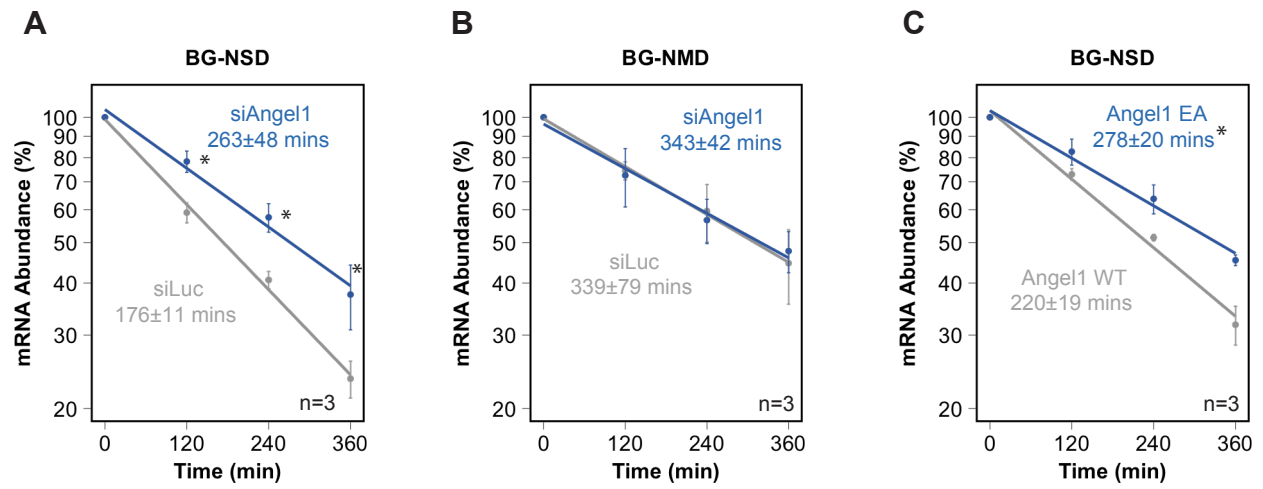

## Supplementary Figure S1. FLAG-Angel1 HEK293 FipIn T-REx cell line validation

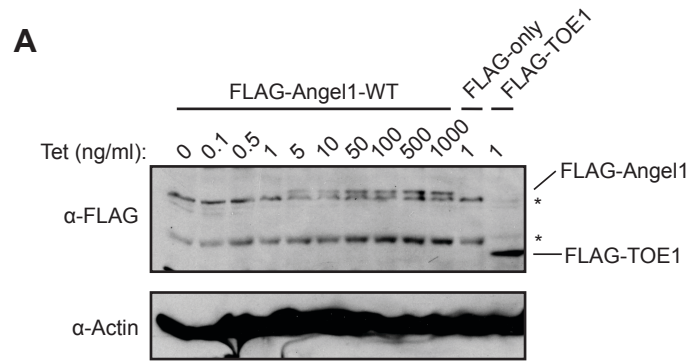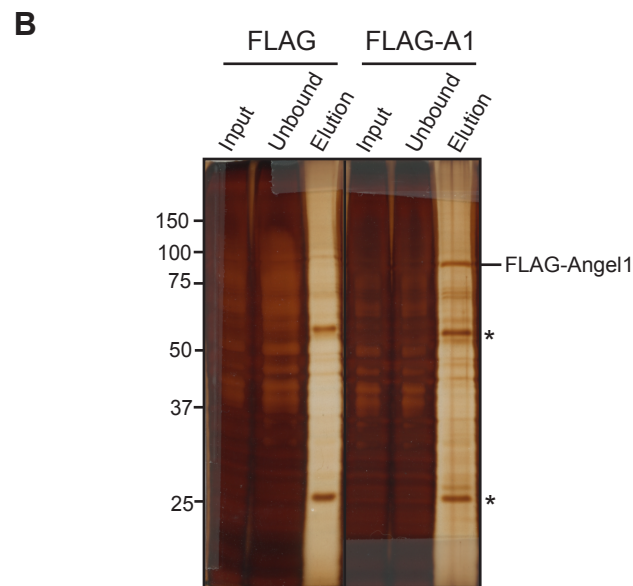

## Supplementary Figure S2. Extended eCLIP analysis

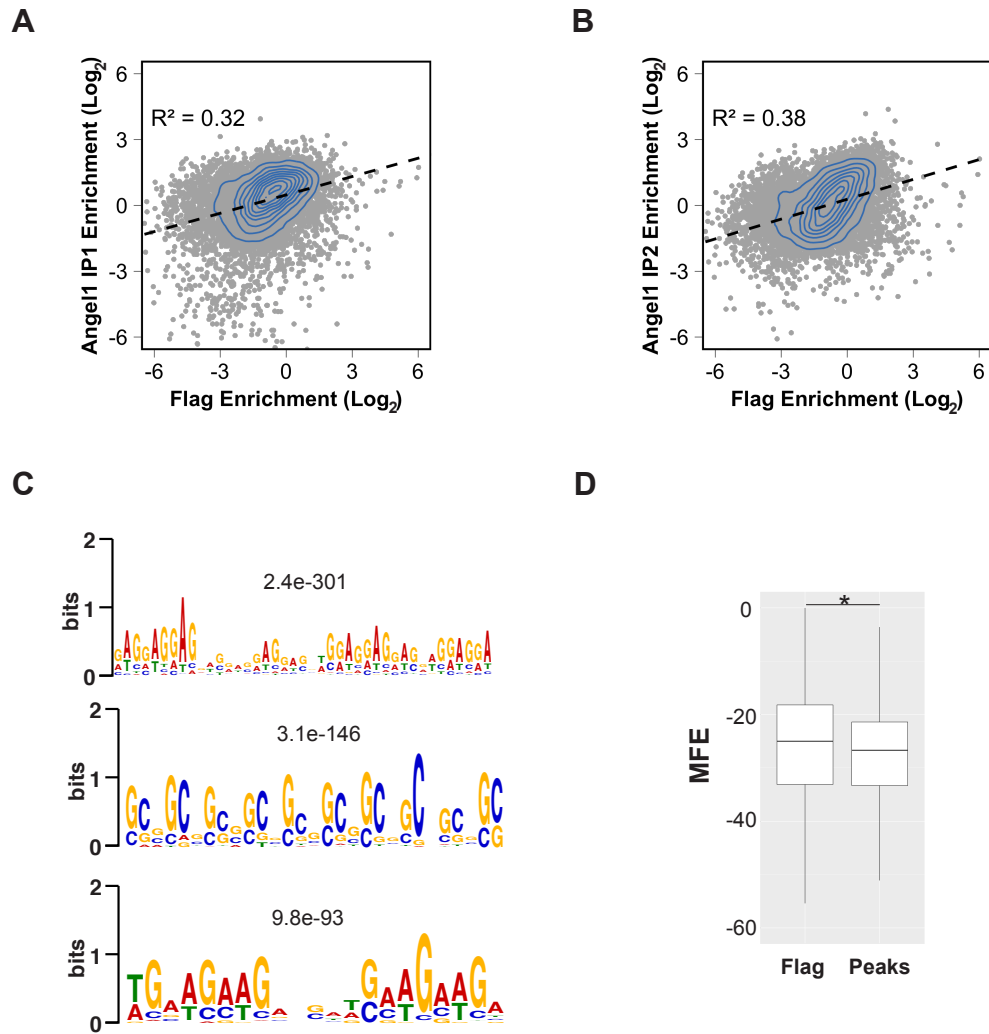

## Supplementary Figure S3. Validation of siRNA-mediated depletions

**A**

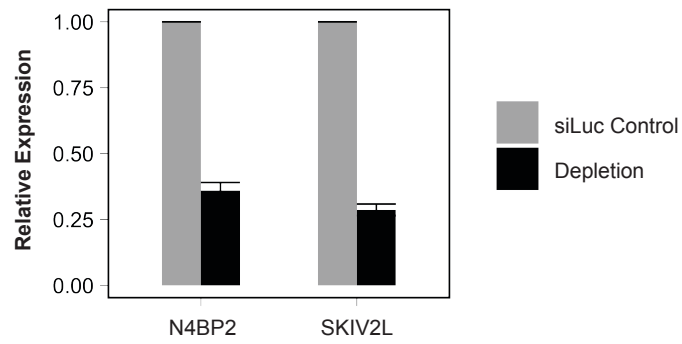

**B**

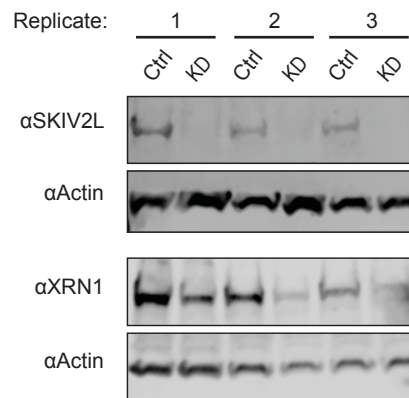

## Supplementary Figure S4. Additional BG-NSD validation

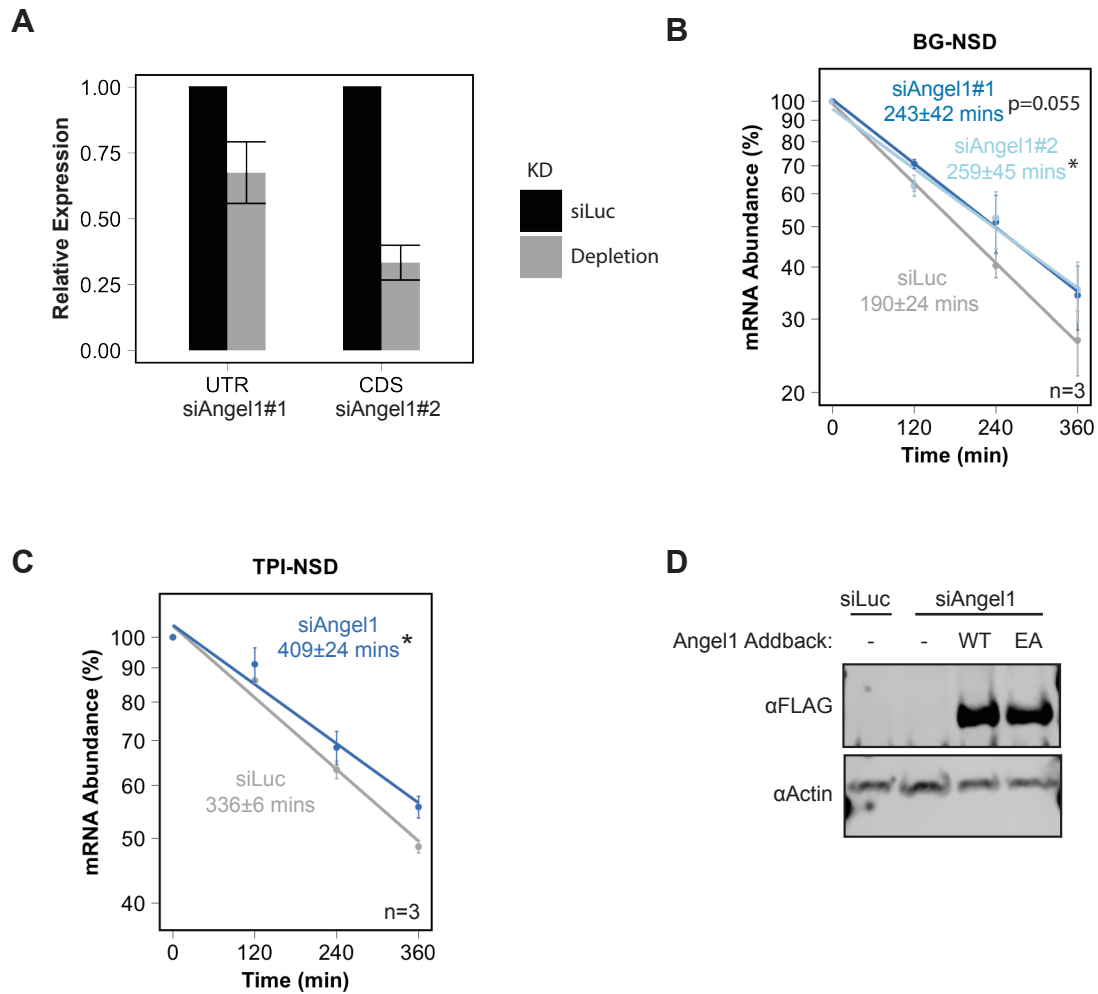

## Supplementary Figure S5. Angel1 shows no activity in a deadenylation assay

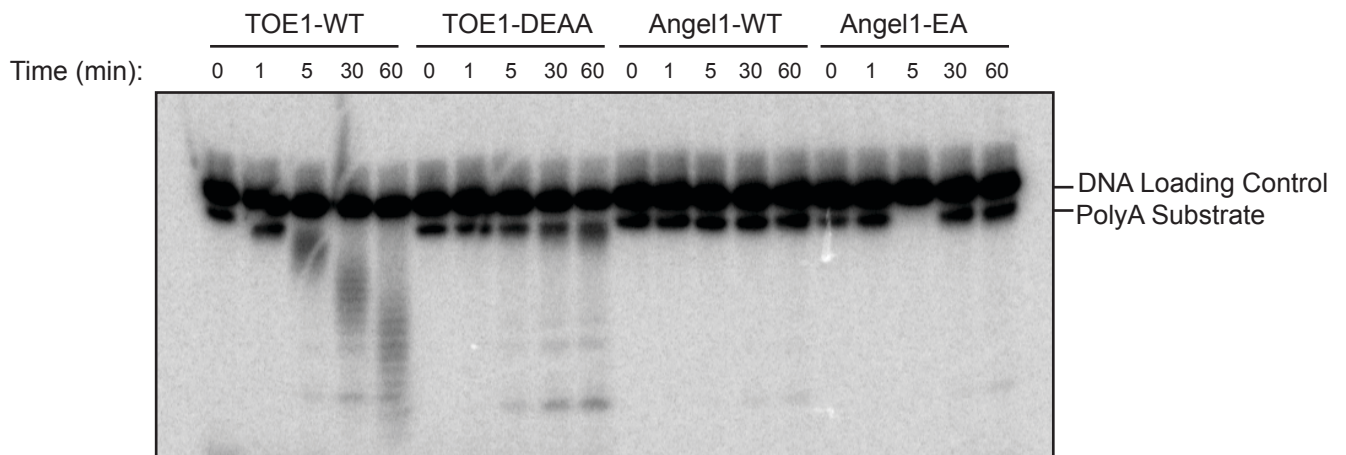

Source: https://www.biorxiv.org/content/10.1101/2022.04.28.489582v1.full.pdf
